# Supplementary material for: Hyperthermia Enhances Efficacy of Chemotherapeutic Agents in Pancreatic Cancer Cell Lines
Source: MDPI journal article supplement (doi:10.3390/biom12050651), 2022-04-29
Supplement: s1 [file s1]

# Supplementary Materials

## Hyperthermia Enhances Efficacy of Chemotherapeutic Agents in Pancreatic Cancer Cell Lines

Costanza E. Maurici <sup>1,†</sup>, Robin Colenbier <sup>2,3,†</sup>, Britta Wylleman <sup>1</sup>, Luigi Brancato <sup>1</sup>, Eke van Zwol <sup>1</sup>, Johan Van den Bossche <sup>1</sup>, Jean-Pierre Timmermans <sup>2</sup>, Elisa Giovannetti <sup>3,4</sup>, Marina G. M. C. Mori da Cunha <sup>1,†</sup> and Johannes Bogers <sup>1,2,5,\*</sup>

<sup>1</sup> ElmediX NV, 2800 Mechelen, Belgium; costanza.maurici@elmedix.com (C.E.M.); britta.wylleman@gmail.com (B.W.); luigi.brancato@elmedix.com (L.B.); eke.vanzwol@elmedix.com (E.v.Z.); johan.vandenbossche@elmedix.com (J.V.d.B.); biamori@gmail.com (M.G.M.C.M.d.C.)  
<sup>2</sup> Laboratory of Cell Biology and Histology, Faculty of Medicine and Health Sciences University of Antwerp, 2610 Antwerp, Belgium; robin.colenbier@uantwerpen.be (R.C.); jean-pierre.timmermans@uantwerpen.be (J.-P.T.)  
<sup>3</sup> Cancer Center Amsterdam, Department of Medical Oncology, Amsterdam UMC, 1006 Amsterdam, The Netherlands; elisa.giovannetti@gmail.com  
<sup>4</sup> Cancer Pharmacology Lab, Fondazione Pisana per la Scienza, 56017 Pisa, Italy  
<sup>5</sup> Applied Molecular Biology Research Group (AMBIOR), University of Antwerp, 2610 Antwerp, Belgium  
\* Correspondence: john-paul.bogers@elmedix.com  
† These authors contributed equally to this work.

### Supplementary Tables

**Supplementary Table S1.** Serial dilution of chemotherapeutics applied in pancreatic cancer cell lines.

|                |        |         |         |        |         |         |          |          |           |         |
|----------------|--------|---------|---------|--------|---------|---------|----------|----------|-----------|---------|
| 5-Fluorouracil | 200 µM | 66.6 µM | 22.2 µM | 7.4 µM | 2.47 µM | 0.82 µM | 0.27 µM  | 0.091 µM | 0.030 µM  | Vehicle |
| Gemcitabine    | 200 µM | 50 µM   | 12.5 µM | 3.1 µM | 0.78 µM | 0.19 µM | 0.049 µM | 0.012 µM | 0.0030 µM | Vehicle |
| Cisplatin      | 200 µM | 66.6 µM | 22.2 µM | 7.4 µM | 2.47 µM | 0.82 µM | 0.27 µM  | 0.091 µM | 0.030 µM  | Vehicle |

**Supplementary Table S2.** IC<sub>50,drug</sub>, IT<sub>50,HT</sub> and combination doses between hyperthermia and 5-fluorouracil, gemcitabine, and cisplatin. (6-, 12-, and 24 hours).

|                |      |                  | BxPC-3                      |                                      |                                     | PANC-1                      |                                      |                                     | Capan-1                     |                                      |                                     | Capan-2                     |                                      |                                     | MIA-PaCa-2                  |                                      |                                     |
|----------------|------|------------------|-----------------------------|--------------------------------------|-------------------------------------|-----------------------------|--------------------------------------|-------------------------------------|-----------------------------|--------------------------------------|-------------------------------------|-----------------------------|--------------------------------------|-------------------------------------|-----------------------------|--------------------------------------|-------------------------------------|
| Drug           | Time | $T_{HT}$<br>(°C) | IT <sub>50,HT</sub><br>(°C) | IC <sub>50,drug</sub><br>( $\mu M$ ) | C <sub>50,drug</sub><br>( $\mu M$ ) | IT <sub>50,HT</sub><br>(°C) | IC <sub>50,drug</sub><br>( $\mu M$ ) | C <sub>50,drug</sub><br>( $\mu M$ ) | IT <sub>50,HT</sub><br>(°C) | IC <sub>50,drug</sub><br>( $\mu M$ ) | C <sub>50,drug</sub><br>( $\mu M$ ) | IT <sub>50,HT</sub><br>(°C) | IC <sub>50,drug</sub><br>( $\mu M$ ) | C <sub>50,drug</sub><br>( $\mu M$ ) | IT <sub>50,HT</sub><br>(°C) | IC <sub>50,drug</sub><br>( $\mu M$ ) | C <sub>50,drug</sub><br>( $\mu M$ ) |
| 5-Fluorouracil | 6 h  | 40.5             | 44.6                        | 4.14                                 | 4.24                                | 48                          | 5.32                                 | 4.09                                | 42.6                        | 0.31                                 | 0.25                                | 46.1                        | 57.76                                | 78.22                               | 44.6                        | 6.70                                 | 7.50                                |
|                |      | 41               |                             |                                      | 4.38                                |                             |                                      | 5.91                                |                             |                                      | 0.32                                |                             |                                      | 96.02                               |                             |                                      | 7.31                                |
|                |      | 41.5             |                             |                                      | 5.04                                |                             |                                      | 25.99                               |                             |                                      | 0.14                                |                             |                                      | 47.49                               |                             |                                      | 7.16                                |
|                | 12 h | 40.5             | 43.5                        | 4.38                                 | 1.25                                | 46.4                        | 7.69                                 | 6.39                                | 41.2                        | 0.35                                 | 0.13                                | 45.1                        | 60.83                                | 79.21                               | 43.4                        | 7.06                                 | 5.26                                |
|                |      | 41               |                             |                                      | 0.90                                |                             |                                      | 7.23                                |                             |                                      | 0.05                                |                             |                                      | 74.52                               |                             |                                      | 5.04                                |
|                |      | 41.5             |                             |                                      | 1.03                                |                             |                                      | 2.98                                |                             |                                      | 0.0004                              |                             |                                      | 39.44                               |                             |                                      | 3.17                                |
|                | 24 h | 40.5             | 41                          | 5.04                                 | 0.90                                | 41.5                        | 9.11                                 | 1.63                                | 41                          | 0.26                                 | 0.018                               | 41.9                        | 41.36                                | 13.57                               | 41.45                       | 5.9                                  | 4.70                                |
|                |      | 41               |                             |                                      | 0.04                                |                             |                                      | 0.12                                |                             |                                      | 0.0036                              |                             |                                      | 6.03                                |                             |                                      | 2.37                                |
|                |      | 41.5             |                             |                                      | 0.00015                             |                             |                                      | 0.13                                |                             |                                      | 0.0002                              |                             |                                      | 1.18                                |                             |                                      | 0.03                                |
| Gemcitabine    | 6 h  | 40.5             | 44.6                        | 0.21                                 | 0.30                                | 48                          | 76.84                                | 150.70                              | 42.6                        | 0.14                                 | 0.12                                | 46.1                        | 2.32                                 | 2.75                                | 44.6                        | 0.15                                 | 0.16                                |
|                |      | 41               |                             |                                      | 0.29                                |                             |                                      | 56.14                               |                             |                                      | 0.11                                |                             |                                      | 2.27                                |                             |                                      | 0.14                                |
|                |      | 41.5             |                             |                                      | 0.27                                |                             |                                      | -                                   |                             |                                      | 0.06                                |                             |                                      | 2.07                                |                             |                                      | 0.17                                |
|                | 12 h | 40.5             | 43.5                        | 0.08                                 | 0.06                                | 46.4                        | 25.02                                | -                                   | 41.2                        | 0.07                                 | 0.02                                | 45.1                        | 3.06                                 | 5.40                                | 43.4                        | 0.13                                 | 0.10                                |
|                |      | 41               |                             |                                      | 0.024                               |                             |                                      | 17.57                               |                             |                                      | 0.009                               |                             |                                      | 5.44                                |                             |                                      | 0.09                                |
|                |      | 41.5             |                             |                                      | 0.022                               |                             |                                      | 5.57                                |                             |                                      | 0.00005                             |                             |                                      | 3.93                                |                             |                                      | 0.08                                |
|                | 24 h | 40.5             | 41                          | 0.06                                 | 0.01                                | 41.5                        | 19.34                                | 0.20                                | 41                          | 0.06                                 | 0.0055                              | 41.9                        | 0.40                                 | 0.28                                | 41.45                       | 0.12                                 | 0.10                                |
|                |      | 41               |                             |                                      | 0.0016                              |                             |                                      | 0.05                                |                             |                                      | 0.0013                              |                             |                                      | 0.08                                |                             |                                      | 0.06                                |
|                |      | 41.5             |                             |                                      | 0.00006                             |                             |                                      | -                                   |                             |                                      | 0.0002                              |                             |                                      | 0.015                               |                             |                                      | 0.0008                              |
| Cisplatin      | 6 h  | 40.5             | 44.6                        | 2.39                                 | 1.77                                | 48                          | 5.14                                 | 7.31                                | 42.6                        | 0.32                                 | 0.33                                | 46.1                        | 13.55                                | 10.52                               | 44.6                        | 6.30                                 | 6.43                                |
|                |      | 41               |                             |                                      | 1.75                                |                             |                                      | 7.63                                |                             |                                      | 0.34                                |                             |                                      | 9.76                                |                             |                                      | 6.40                                |
|                |      | 41.5             |                             |                                      | 1.69                                |                             |                                      | 5.32                                |                             |                                      | 0.18                                |                             |                                      | 11.58                               |                             |                                      | 5.54                                |
|                | 12 h | 40.5             | 43.5                        | 1.56                                 | 0.67                                | 46.4                        | 5.27                                 | 4.07                                | 41.2                        | 0.28                                 | 0.21                                | 45.1                        | 0.28                                 | 0.21                                | 43.4                        | 4.67                                 | 4.35                                |
|                |      | 41               |                             |                                      | 0.57                                |                             |                                      | 3.25                                |                             |                                      | 0.07                                |                             |                                      | 0.07                                |                             |                                      | 3.56                                |
|                |      | 41.5             |                             |                                      | 0.36                                |                             |                                      | 2.18                                |                             |                                      | 0.0018                              |                             |                                      | 0.0019                              |                             |                                      | 2.17                                |
|                | 24 h | 40.5             | 41                          | 1.40                                 | 0.12                                | 41.5                        | 12.11                                | 1.03                                | 41                          | 0.27                                 | 0.017                               | 41.9                        | 0.27                                 | 0.017                               | 41.45                       | 5.59                                 | 2.72                                |
|                |      | 41               |                             |                                      | 0.0016                              |                             |                                      | 0.06                                |                             |                                      | 0.005                               |                             |                                      | 0.0053                              |                             |                                      | 0.33                                |
|                |      | 41.5             |                             |                                      | 0.00012                             |                             |                                      | 0.014                               |                             |                                      | 0.0007                              |                             |                                      | 0.0007                              |                             |                                      | 0.0007                              |

**Supplementary Table S3.** IC<sub>50, ratio, drug</sub> and combination index (CI) values of chemotherapy combined with hyperthermia treatment. CI) lower than 0.9 indicates synergism, between 0.9 and 1.1, additivity and higher than 1.1 indicates antagonism.

|                |               | BxPC-3                      |      |           | PANC-1                      |      |           | Capan-1                     |      |           | Capan-2                     |      |           | MIA-PaCa-2                  |      |           |
|----------------|---------------|-----------------------------|------|-----------|-----------------------------|------|-----------|-----------------------------|------|-----------|-----------------------------|------|-----------|-----------------------------|------|-----------|
| Drug           | Thermal dose  | IC50 <sub>ratio, drug</sub> | CI   | Type      |
| 5-Fluorouracil | 6h at 40.5°C  | 1,02                        | 1,49 | Antagonic | 0,77                        | 1,09 | Additive  | 0,80                        | 1,43 | Antagonic | 1,35                        | 1,74 | Antagonic | 1,12                        | 1,58 | Antagonic |
|                | 6h at 41°C    | 1,06                        | 1,58 | Antagonic | 1,11                        | 1,47 | Antagonic | 1,05                        | 1,76 | Antagonic | 1,66                        | 2,1  | Antagonic | 1,09                        | 1,62 | Antagonic |
|                | 6h at 41.5°C  | 1,22                        | 1,81 | Antagonic | 4,88                        | 5,29 | Antagonic | 0,44                        | 1,25 | Antagonic | 0,82                        | 1,32 | Antagonic | 1,07                        | 1,66 | Antagonic |
|                | 12h at 40.5°C | 0,29                        | 0,83 | Synergic  | 0,83                        | 1,2  | Antagonic | 0,37                        | 1,21 | Antagonic | 1,30                        | 1,73 | Antagonic | 0,75                        | 1,29 | Antagonic |
|                | 12h at 41°C   | 0,20                        | 0,82 | Synergic  | 0,94                        | 1,37 | Antagonic | 0,15                        | 1,1  | Additive  | 1,23                        | 1,72 | Antagonic | 0,71                        | 1,34 | Antagonic |
|                | 12h at 41.5°C | 0,24                        | 0,93 | Additive  | 0,39                        | 0,87 | Synergic  | 0,001                       | 1,07 | Additive  | 0,65                        | 1,2  | Antagonic | 0,45                        | 1,15 | Antagonic |
|                | 24h at 40.5°C | 0,18                        | 1,05 | Additive  | 0,18                        | 0,96 | Additive  | 0,07                        | 0,94 | Additive  | 0,33                        | 1,04 | Additive  | 0,80                        | 1,58 | Antagonic |
|                | 24h at 41°C   | 0,008                       | 1,01 | Additive  | 0,01                        | 0,9  | Additive  | 0,01                        | 1,01 | Additive  | 0,15                        | 0,96 | Additive  | 0,40                        | 1,3  | Antagonic |
|                | 24h at 41.5°C | 2,95E-05                    | 1,13 | Antagonic | 0,01                        | 1,01 | Additive  | 0,0007                      | 1,13 | Antagonic | 0,03                        | 0,95 | Additive  | 0,006                       | 1,02 | Additive  |
| Gemcitabine    | 6h at 40.5°C  | 1,44                        | 1,9  | Antagonic | 1,96                        | 2,28 | Antagonic | 0,88                        | 1,5  | Antagonic | 1,18                        | 1,57 | Antagonic | 1,07                        | 1,53 | Antagonic |
|                | 6h at 41°C    | 1,40                        | 1,93 | Antagonic | 0,73                        | 1,09 | Additive  | 0,80                        | 1,52 | Antagonic | 0,98                        | 1,42 | Antagonic | 0,95                        | 1,47 | Antagonic |
|                | 6h at 41.5°C  | 1,30                        | 1,88 | Antagonic | -                           | -    | -         | 0,42                        | 1,22 | Antagonic | 0,89                        | 1,39 | Antagonic | 1,15                        | 1,74 | Antagonic |
|                | 12h at 40.5°C | 0,77                        | 1,31 | Antagonic | -                           | -    | -         | 0,30                        | 1,13 | Antagonic | 1,76                        | 2,2  | Antagonic | 0,81                        | 1,36 | Antagonic |
|                | 12h at 41°C   | 0,30                        | 0,91 | Additive  | 0,70                        | 1,13 | Antagonic | 0,13                        | 1,09 | Additive  | 1,78                        | 2,27 | Antagonic | 0,74                        | 1,37 | Antagonic |
|                | 12h at 41.5°C | 0,27                        | 0,96 | Additive  | 0,22                        | 0,7  | Synergic  | 0,0008                      | 1,07 | Additive  | 1,28                        | 1,84 | Antagonic | 0,60                        | 1,31 | Antagonic |
|                | 24h at 40.5°C | 0,17                        | 1,05 | Additive  | 0,01                        | 0,79 | Synergic  | 0,085                       | 0,96 | Additive  | 0,69                        | 1,4  | Antagonic | 0,82                        | 1,6  | Antagonic |
|                | 24h at 41°C   | 0,026                       | 1,03 | Additive  | 0,002                       | 0,89 | Synergic  | 0,02                        | 1,02 | Additive  | 0,19                        | 1,01 | Additive  | 0,52                        | 1,41 | Antagonic |
|                | 24h at 41.5°C | 0,001                       | 1,13 | Antagonic | -                           | -    | -         | 0,003                       | 1,13 | Additive  | 0,04                        | 0,95 | Additive  | 0,007                       | 1,02 | Additive  |
| Cisplatin      | 6h at 40.5°C  | 0,74                        | 1,2  | Antagonic | 1,4                         | 1,74 | Antagonic | 1,00                        | 1,63 | Antagonic | 0,78                        | 1,16 | Antagonic | 1,02                        | 1,48 | Antagonic |
|                | 6h at 41°C    | 0,73                        | 1,26 | Antagonic | 1,48                        | 1,85 | Antagonic | 1,04                        | 1,76 | Antagonic | 0,72                        | 1,16 | Antagonic | 1,01                        | 1,54 | Antagonic |
|                | 6h at 41.5°C  | 0,70                        | 1,3  | Antagonic | 1,04                        | 1,44 | Antagonic | 0,56                        | 1,37 | Antagonic | 0,85                        | 1,35 | Antagonic | 0,88                        | 1,47 | Antagonic |
|                | 12h at 40.5°C | 0,43                        | 0,97 | Additive  | 0,77                        | 1,14 | Antagonic | 0,75                        | 1,58 | Antagonic | 0,75                        | 1,18 | Antagonic | 0,93                        | 1,48 | Antagonic |
|                | 12h at 41°C   | 0,36                        | 0,98 | Additive  | 0,62                        | 1,04 | Additive  | 0,26                        | 1,21 | Antagonic | 0,26                        | 0,76 | Synergic  | 0,76                        | 1,39 | Antagonic |
|                | 12h at 41.5°C | 0,23                        | 0,92 | Additive  | 0,41                        | 0,89 | Synergic  | 0,007                       | 1,08 | Additive  | 0,007                       | 0,56 | Synergic  | 0,47                        | 1,17 | Antagonic |
|                | 24h at 40.5°C | 0,08                        | 0,96 | Additive  | 0,08                        | 0,86 | Synergic  | 0,06                        | 0,94 | Additive  | 0,06                        | 0,78 | Synergic  | 0,49                        | 1,27 | Antagonic |
|                | 24h at 41°C   | 0,001                       | 1    | Additive  | 0,005                       | 0,89 | Synergic  | 0,02                        | 1,02 | Additive  | 0,02                        | 0,84 | Synergic  | 0,06                        | 0,96 | Additive  |
|                | 24h at 41.5°C | 8,50E-05                    | 1,13 | Antagonic | 0,001                       | 1    | Additive  | 0,003                       | 1,13 | Antagonic | 0,003                       | 0,92 | Additive  | 0,0001                      | 1,01 | Additive  |

## Supplementary Figures

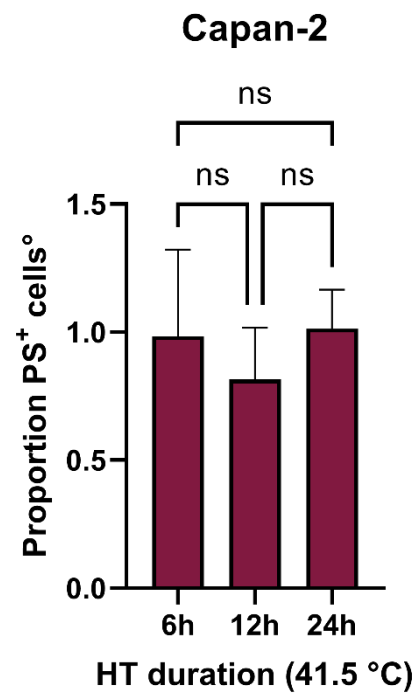

**Supplementary Figure S1: Expression of phosphatidylserine (PS) on the outer membrane of Capan-2.** No significant differences in PS positivity were observed.

# BxPC-3

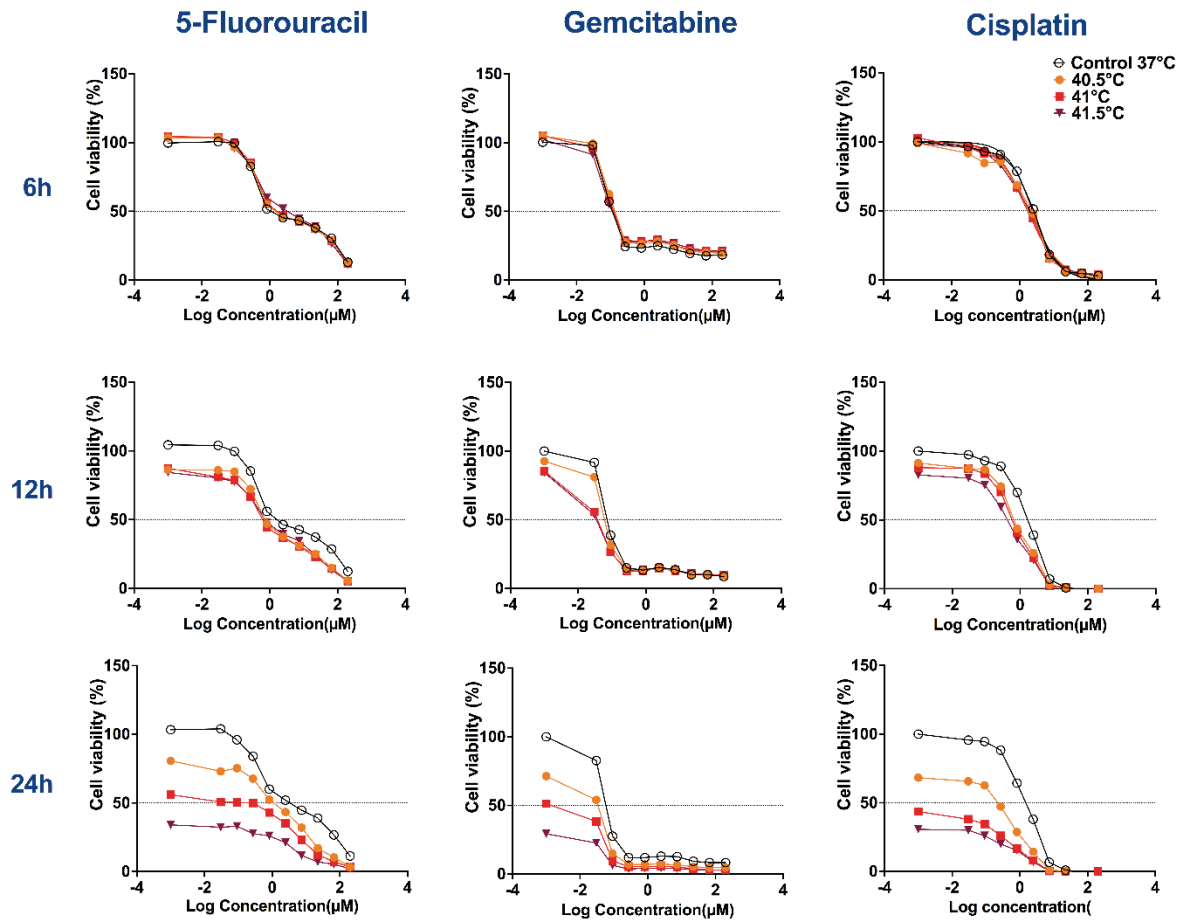

**Supplementary Figure S2:** Dose curve response of BxPC-3 to 5-fluorouracil, gemcitabine and cisplatin. These data represent triplicates.

# PANC-1

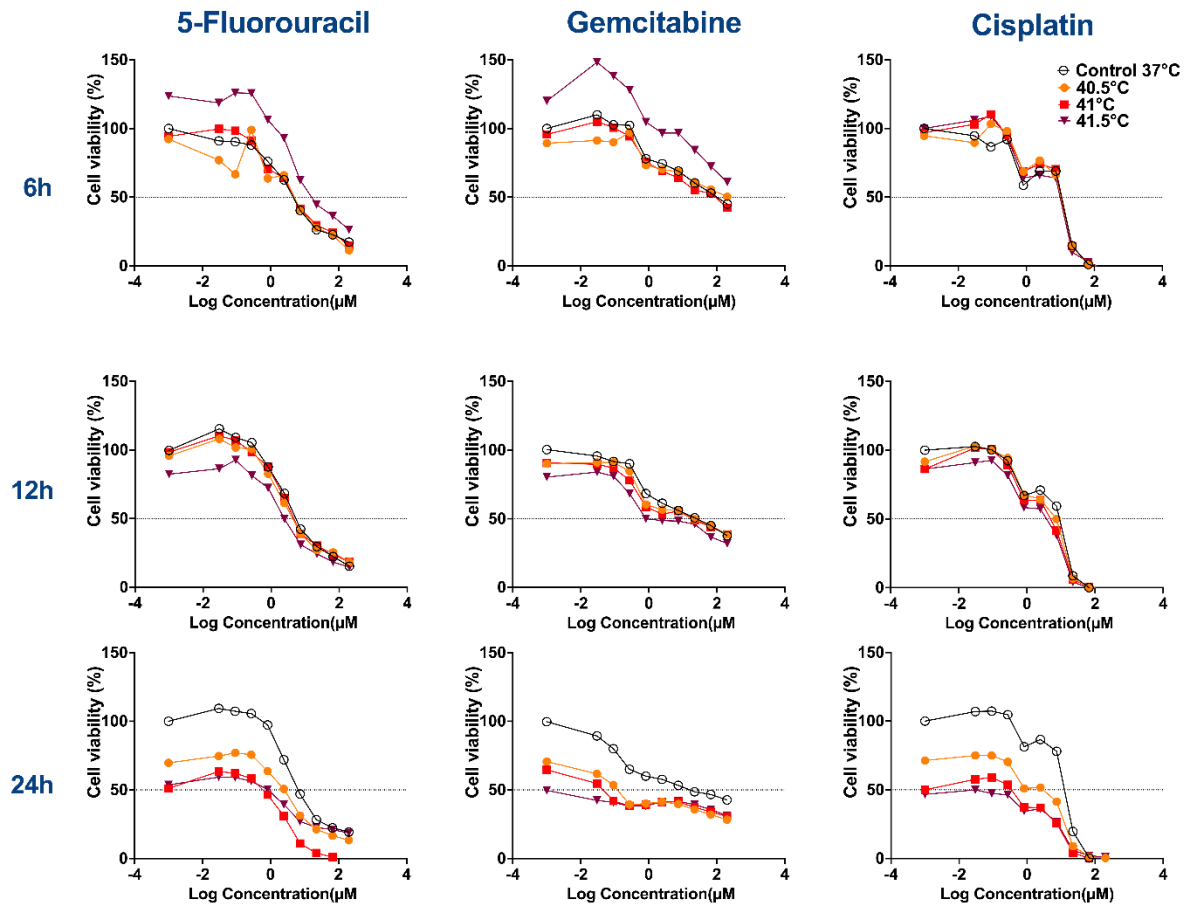

Supplementary Figure S3: Dose curve response of PANC-1 to 5-fluorouracil, gemcitabine and cisplatin. These data represent triplicates.

# Capan-1

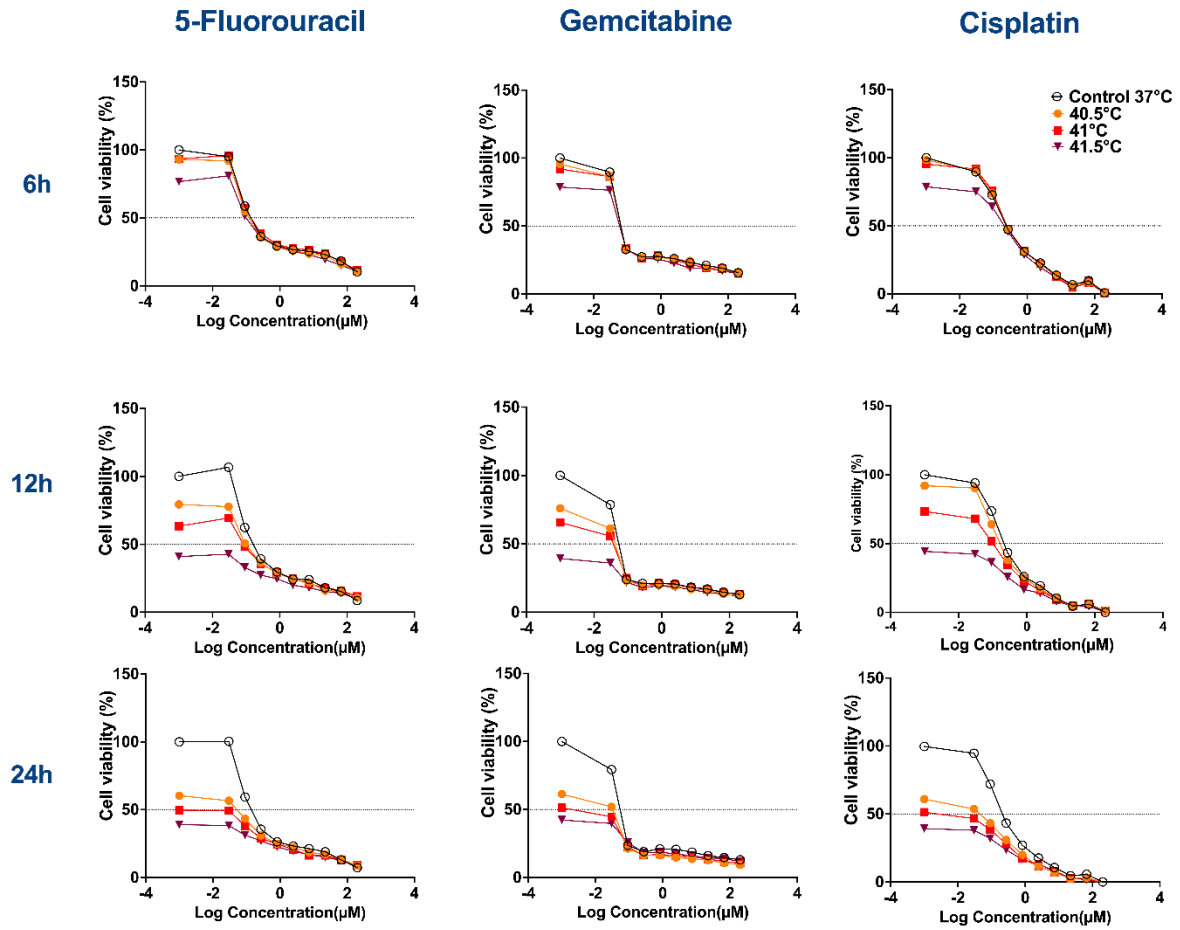

**Supplementary Figure S4:** Dose curve response of Capan-1 to 5-fluorouracil, gemcitabine and cisplatin. These data represent triplicates.

# Capan-2

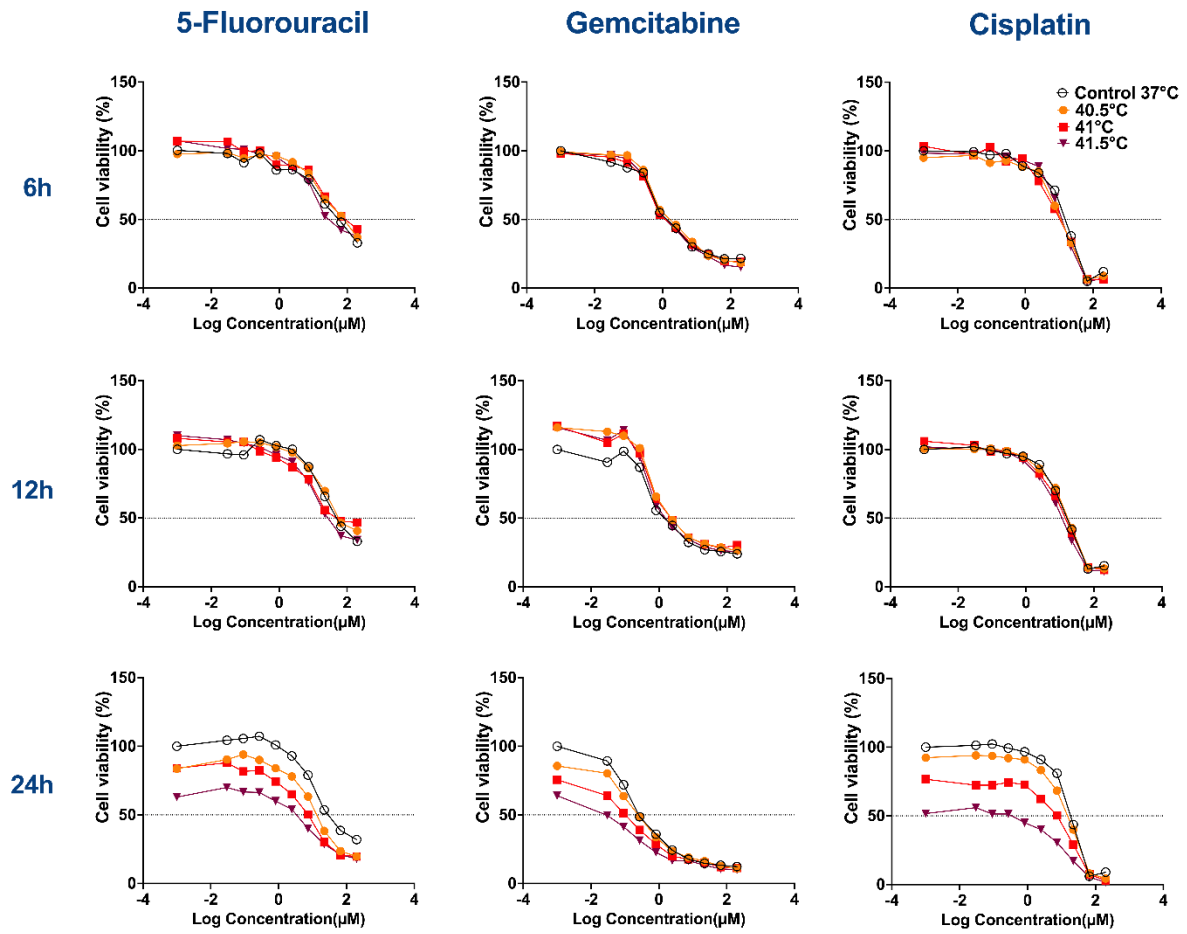

**Supplementary Figure S5:** Dose curve response of Capan-2 to 5-fluorouracil, gemcitabine and cisplatin. These data represent triplicates.



# MIA PaCa-2

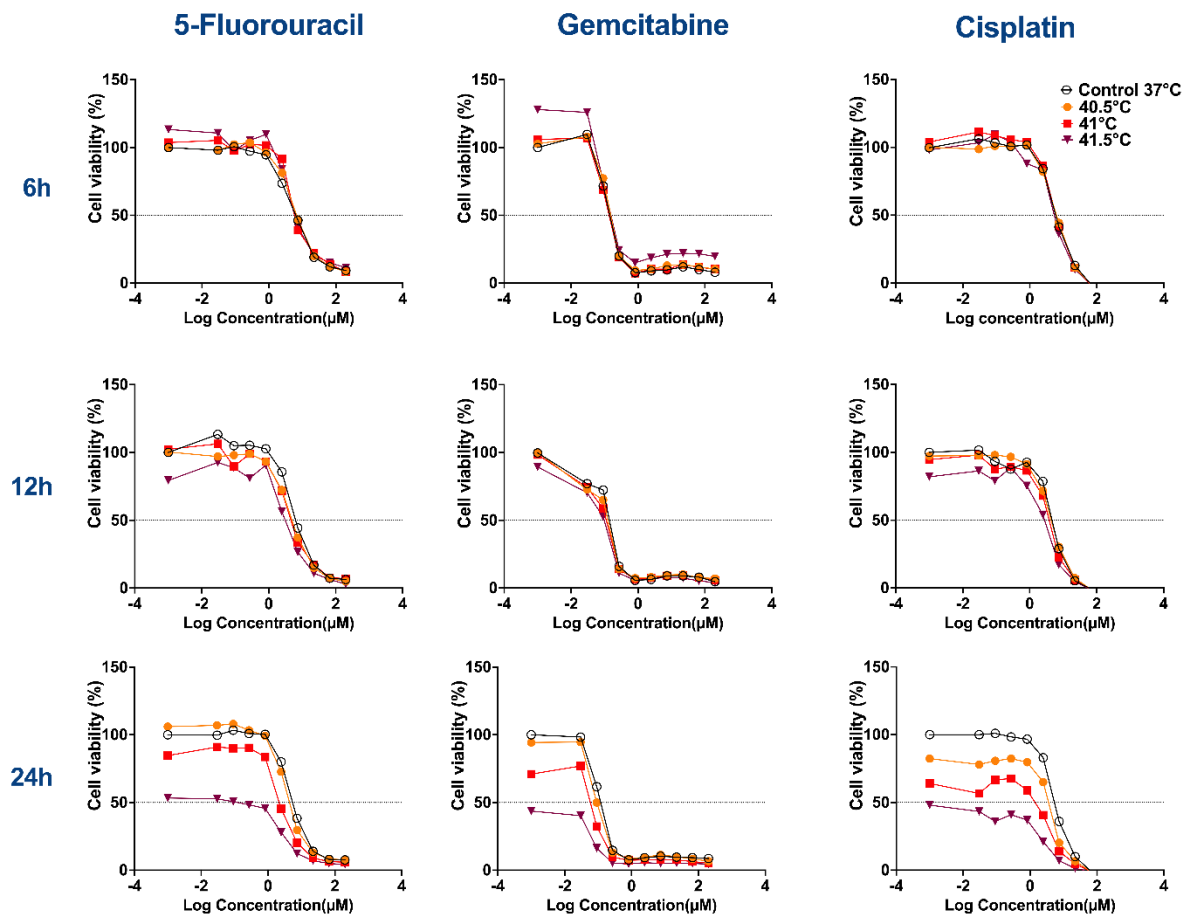

**Supplementary Figure S6:** Dose curve response of MIA PaCa-2 to 5-fluorouracil, gemcitabine and cisplatin. These data represent triplicates.
